# Supplementary material
Source: HighWire-hosted journal article supplement (doi:10.1101/rna.034900.112)
Supplement: Supp_Table1.xlsx [file Supp_Table1.xlsx]

## Sheet: EBER1-MS2 HEAVY
Supplementary Table S1, Sheet I: EBER1-MS2 heavy
Gene Names	Protein Name	Mol. Weight [kDa]	PEP	Ratio H/L Count	Ratio H/L Normalized	log2 Ratio H/L
SSB;hCG_2005701	La autoantigen;La ribonucleoprotein;Lupus La protein;Sjoegren syndrome type B antigen;Autoantigen La;La 4.1 protein;Ribonucleoprotein (La);Putative uncharacterized protein SSB;Sjogren syndrome antigen B (Autoantigen La);Sjogren syndrome antigen B (Autoantigen La), isoform CRA_c;SS-B/La protein	46.836	1.7332e-162	7	42.985	5.42576
HNRNPA1;HNRPA1;HNRPA1L3	Helix-destabilizing protein;Heterogeneous nuclear ribonucleoprotein A1;hnRNP core protein A1;Single-strand RNA-binding protein;HNRPA1 protein;Putative uncharacterized protein;hnRNP core protein A1-like 3;Putative heterogeneous nuclear ribonucleoprotein A1-like 3;Putative uncharacterized protein ENSP00000383298;cDNA FLJ51586, moderately similar to Heterogeneous nuclear ribonucleoprotein A1;cDNA FL…	38.845	0.013725	1	25.021	4.64507
HNRNPA2B1;HNRPA2B1	Heterogeneous nuclear ribonucleoproteins A2/B1;Putative uncharacterized protein HNRNPA2B1	37.429	1.744e-67	5	14.622	3.87007
AUF1;HNRNPD;HNRPD	AU-rich element RNA-binding protein 1;Heterogeneous nuclear ribonucleoprotein D0;cDNA FLJ54150, highly similar to Heterogeneous nuclear ribonucleoprotein D0;cDNA FLJ61020, highly similar to Heterogeneous nuclear ribonucleoprotein D0;P37 AUF1;Putative uncharacterized protein HNRNPD	38.434	3.348e-07	1	13.948	3.80199
ANT3;CDABP0051;SLC25A6;hCG_1746794	Adenine nucleotide translocator 3;ADP,ATP carrier protein 3;ADP,ATP carrier protein, isoform T2;ADP/ATP translocase 3;Solute carrier family 25 member 6;ADP,ATP carrier protein, liver isoform T2 variant;cDNA, FLJ92654, highly similar to Homo sapiens solute carrier family 25 (mitochondrial carrier; adenine nucleotide translocator), member 6 (SLC25A6), mRNA;SLC25A6 protein;Solute carrier family 25 (…	32.866	9.3885e-17	5	1.208	0.27262
ANT2;SLC25A5;ANT1;SLC25A4	Adenine nucleotide translocator 2;ADP,ATP carrier protein 2;ADP,ATP carrier protein, fibroblast isoform;ADP/ATP translocase 2;Solute carrier family 25 member 5;cDNA, FLJ96310, highly similar to Homo sapiens solute carrier family 25 (mitochondrial carrier; adenine nucleotide translocator), member 5 (SLC25A5), mRNA;SLC25A5 protein;Adenine nucleotide translocator 1;ADP,ATP carrier protein 1;ADP,ATP …	32.895	4.3901e-19	1	1.0547	0.0768327
KIAA0152;MLEC	Malectin	32.233	6.7201e-207	6	1.0207	0.0295589
EEF1A2;EEF1AL;STN;EEF1A;EEF1A1;EF1A;LENG7;EEF1A1L14;PTI-1;hCG_2033271;RP11-505P4.2-001;EEF1AL3;RP11-505P4.2-015;RP11-505P4.2-003	Elongation factor 1-alpha 2;Eukaryotic elongation factor 1 A-2;Statin-S1;Elongation factor 1-alpha 1;Elongation factor Tu;Eukaryotic elongation factor 1 A-1;Leukocyte receptor cluster member 7;Elongation factor 1-alpha;Eukaryotic translation elongation factor 1 alpha;cDNA FLJ54032, highly similar to Elongation factor 1-alpha 1;Eukaryotic elongation factor 1 A-like 3;Putative elongation factor 1-a…	50.47	0.014006	1	0.96872	-0.0458484
NSEP1;YB1;YBX1	CCAAT-binding transcription factor I subunit A;DNA-binding protein B;Enhancer factor I subunit A;Nuclease-sensitive element-binding protein 1;Y-box transcription factor;Y-box-binding protein 1;YBX1 protein;Nuclease sensitive element binding protein-1;RcNSEP1;Putative uncharacterized protein YBX1	41.905	7.9196e-138	4	0.86481	-0.209545
BAP;PHB2;REA	B-cell receptor-associated protein BAP37;D-prohibitin;Prohibitin-2;Repressor of estrogen receptor activity;PNAS-141	33.296	4.2732e-10	1	0.79773	-0.326028
KIAA0042;KIF14	Kinesin-like protein KIF14	186.49	0.19908	1	0.1283	-2.96241
HHIP;HIP;UNQ5825/PRO19644	Hedgehog-interacting protein;cDNA FLJ77575, highly similar to Homo sapiens hedgehog interacting protein (HHIP), mRNA	98.427	0.3245	1	0.087602	-3.51289
DCD;AIDD;DSEP;hCG_1820620;PIF	Dermcidin isoform 2;DCD-1;Dermcidin;Preproteolysin;Survival-promoting peptide;Proteolysis inducing factor	12.414	2.7624e-06	6	0.046209	-4.43568
ACTA2;ACTSA;ACTVS;GIG46;ACT;ACTA;ACTA1;ACTC;ACTC1;ACTA3;ACTG2;ACTL3;ACTSG;RP5-1068B5.2-002;RP5-1068B5.2-003;RP11-399O19.2-002	cDNA FLJ78096, highly similar to Homo sapiens actin, alpha, cardiac muscle (ACTC), mRNA;Actin, aortic smooth muscle;Alpha-actin-2;Cell growth-inhibiting gene 46 protein;cDNA FLJ32030 fis, clone NTONG2000040, highly similar to Actin, alpha cardiac;cDNA FLJ52761, highly similar to Actin, aortic smooth muscle;Actin-like protein;Actin, alpha skeletal muscle;Alpha-actin-1;Actin, alpha cardiac muscle 1…	42.047	2.1309e-105	2	0.027725	-5.17267

## Sheet: EBER-MS2 LIGHT
Supplementary Table S1, Sheet II: EBER1-MS2 light
Gene Names	Protein Name	Mol. Weight [kDa]	PEP	Ratio H/L Count	Ratio H/L Normalized	log2 Ratio H/L
KIAA0042;KIF14	Kinesin-like protein KIF14	186.49	0.042119	1	0.0055604	-7.4906
LCRMP;DPYSL3;CRMP1;DPYSL1;ULIP3;hCG_39896;CRMP4;DRP3;ULIP;ULIP1	Long form collapsin response mediator protein 1;cDNA FLJ45854 fis, clone OCBBF2024589, highly similar to Dihydropyrimidinase-related protein 1;Collapsin response mediator protein 4 long variant;DPYSL3 protein;Dihydropyrimidinase-like 3;Collapsin response mediator protein 1;Dihydropyrimidinase-related protein 1;Unc-33-like phosphoprotein 3;cDNA FLJ37406 fis, clone BRAMY2028282, highly similar to D…	74.261	0.0084043	7	0.0075591	-7.04757
CDHF1;DSC1;hCG_25474	Cadherin family member 1;Desmocollin-1;Desmosomal glycoprotein 2/3;Desmocollin 1, isoform CRA_b;Desmocollin 1b	99.986	1.5979e-05	6	0.044885	-4.47762
DCD;AIDD;DSEP;hCG_1820620;PIF	Dermcidin isoform 2;DCD-1;Dermcidin;Preproteolysin;Survival-promoting peptide;Proteolysis inducing factor	12.414	7.8113e-43	6	0.059041	-4.08214
RPL22;RPL22L2	60S ribosomal protein L22;EBER-associated protein;Epstein-Barr virus small RNA-associated protein;Heparin-binding protein HBp15;Ribosomal protein L22-like 2;Ribosomal protein L22	14.787	0.00021533	1	0.06403	-3.96511
SERPINB12	SERPINB12 protein;Serpin B12	48.445	3.8504e-15	1	0.11277	-3.14854
CDHF4;DSG1	Cadherin family member 4;Desmoglein-1;Desmosomal glycoprotein 1;Pemphigus foliaceus antigen;cDNA FLJ50928, highly similar to Desmoglein-1	113.71	1.3399e-65	14	0.13245	-2.91648
SSB;hCG_2005701	La autoantigen;La ribonucleoprotein;Lupus La protein;Sjoegren syndrome type B antigen;Autoantigen La;La 4.1 protein;Ribonucleoprotein (La);Putative uncharacterized protein SSB;Sjogren syndrome antigen B (Autoantigen La);Sjogren syndrome antigen B (Autoantigen La), isoform CRA_c;SS-B/La protein	46.836	4.0521e-131	14	0.13699	-2.86786
DSP;DSP variant protein	250/210 kDa paraneoplastic pemphigus antigen;Desmoplakin;cDNA FLJ53584, highly similar to Desmoplakin;cDNA FLJ51487, highly similar to Desmoplakin;cDNA FLJ61543, highly similar to Desmoplakin;DSP variant protein	331.77	2.1451e-20	9	0.16342	-2.61334
PAGA;PAGB;PRDX1;TDPX2	Natural killer cell-enhancing factor A;Peroxiredoxin-1;Proliferation-associated gene protein;Thioredoxin peroxidase 2;Thioredoxin-dependent peroxide reductase 2;cDNA, FLJ92164, highly similar to Homo sapiens peroxiredoxin 1 (PRDX1), mRNA	22.11	0.0062227	3	0.2034	-2.29761
CAGB;CFAG;MRP14;S100A9	Calgranulin-B;Calprotectin L1H subunit;Leukocyte L1 complex heavy chain;Migration inhibitory factor-related protein 14;Protein S100-A9;S100 calcium-binding protein A9;cDNA, FLJ92148, highly similar to Homo sapiens S100 calcium binding protein A9 (calgranulin B) (S100A9), mRNA;Putative uncharacterized protein S100A9	13.242	8.6663e-16	7	0.26328	-1.92533
JUP	cDNA FLJ60424, highly similar to Junction plakoglobin;Putative uncharacterized protein JUP	62.615	1.5503e-113	1	0.3558	-1.49086
UBC;DKFZp434K0435;hCG_1998947;UBB;RPS27A;UBA80;UBCEP1;hCG_1987923;UBA52;UBCEP2;hCG_37048	cDNA FLJ75516, highly similar to Xenopus tropicalis ubiquitin C, mRNA;Ubiquitin C variant;Ubiquitin C splice variant;Putative uncharacterized protein;UBC protein;cDNA FLJ32377 fis, clone SKMUS1000014, highly similar to Polyubiquitin 9;Putative uncharacterized protein DKFZp434K0435;Ubiquitin B;Ubiquitin B, isoform CRA_a;40S ribosomal protein S27a;cDNA, FLJ96793, Homo sapiens ribosomal protein S27a…	77.028	1.4337e-09	15	0.37879	-1.40053
EEF1A2;EEF1AL;STN;EEF1A;EEF1A1;EF1A;LENG7;EEF1A1L14;PTI-1;hCG_2033271;RP11-505P4.2-001;EEF1AL3;RP11-505P4.2-015;RP11-505P4.2-003	Elongation factor 1-alpha 2;Eukaryotic elongation factor 1 A-2;Statin-S1;Elongation factor 1-alpha 1;Elongation factor Tu;Eukaryotic elongation factor 1 A-1;Leukocyte receptor cluster member 7;Elongation factor 1-alpha;Eukaryotic translation elongation factor 1 alpha;cDNA FLJ54032, highly similar to Elongation factor 1-alpha 1;Eukaryotic elongation factor 1 A-like 3;Putative elongation factor 1-a…	50.47	0.004473	5	0.40796	-1.2935
ANX2;ANX2L4;ANXA2;CAL1H;LPC2D;ANX2L2;ANX2P2;ANXA2P2;LPC2B	Annexin A2;Annexin II;Annexin-2;Calpactin I heavy chain;Calpactin-1 heavy chain;Chromobindin-8;Lipocortin II;p36;Placental anticoagulant protein IV;Protein I;cDNA FLJ59138, highly similar to Annexin A2;Annexin A2 pseudogene 2;Lipocortin II pseudogene;Putative annexin A2-like protein;cDNA FLJ34687 fis, clone MESAN2000620, highly similar to Annexin A2	40.411	2.5481e-09	2	0.51811	-0.94867
FABP5	Epidermal-type fatty acid-binding protein;Fatty acid-binding protein 5;Fatty acid-binding protein, epidermal;Psoriasis-associated fatty acid-binding protein homolog	15.164	0.0015397	3	0.65031	-0.6208
GRP78;HSPA5	78 kDa glucose-regulated protein;Endoplasmic reticulum lumenal Ca(2+)-binding protein grp78;Heat shock 70 kDa protein 5;Immunoglobulin heavy chain-binding protein;cDNA FLJ60062, highly similar to 78 kDa glucose-regulated protein;HSPA5 protein	72.421	6.779e-153	5	0.80344	-0.315738
ATP5F1;hCG_39985;RP11-552M11.5-005	ATP synthase subunit b, mitochondrial;cDNA FLJ78635, highly similar to Homo sapiens ATP synthase, H+ transporting, mitochondrial F0 complex, subunit b, isoform 1 (ATP5F1), transcript variant 1, mRNA;cDNA, FLJ94101, Homo sapiens ATP synthase, H+ transporting, mitochondrial F0complex, subunit b, isoform 1 (ATP5F1), mRNA;Cell proliferation-inducing protein 47;HCG39985, isoform CRA_a;ATP synthase, H+…	28.908	0.0041724	1	0.85099	-0.232786
HSP60;HSPD1	60 kDa chaperonin;60 kDa heat shock protein, mitochondrial;Chaperonin 60;Heat shock protein 60;HuCHA60;Mitochondrial matrix protein P1;P60 lymphocyte protein;Mitochondrial heat shock 60kD protein 1 variant 1;cDNA FLJ54912, highly similar to 60 kDa heat shock protein, mitochondrial;cDNA FLJ51028, highly similar to 60 kDa heat shock protein, mitochondrial;cDNA FLJ54373, highly similar to 60 kDa hea…	61.054	1.4616e-09	4	0.85621	-0.223963
HSC70;HSP73;HSPA10;HSPA8	Heat shock 70 kDa protein 8;Heat shock cognate 71 kDa protein;cDNA FLJ77848;cDNA FLJ38781 fis, clone LIVER2000216, highly similar to HEAT SHOCK COGNATE 71 kDa PROTEIN;cDNA FLJ55485, highly similar to Heat shock cognate 71 kDa protein;Heat shock 70kDa protein 8 isoform 1 variant;Putative uncharacterized protein;HSPA8 protein;cDNA FLJ20564 fis, clone KAT12033;Uncharacterized bone marrow protein BM0…	70.897	9.8462e-302	27	0.98182	-0.0264695
COII;COXII;MTCO2;MT-CO2;COX2;CO2	Cytochrome c oxidase polypeptide II;Cytochrome c oxidase subunit 2	25.565	2.7137e-05	1	0.99547	-0.00655026
GRP75;HSPA9;HSPA9B	75 kDa glucose-regulated protein;Heat shock 70 kDa protein 9;Mortalin;Peptide-binding protein 74;Stress-70 protein, mitochondrial;cDNA FLJ51811, highly similar to Stress-70 protein, mitochondrial;cDNA FLJ51907, highly similar to Stress-70 protein, mitochondrial;Heat shock 70 kDa protein 9B;HSPA9 protein;Catecholamine-regulated protein 40;cDNA FLJ51903, highly similar to Stress-70 protein, mitocho…	73.68	1.5289e-88	7	1.0022	0.00317044
PAB1;PABP1;PABPC1;PABPC2;PABP3;PABPC3;PABPL3;hCG_1774619;RP11-165I9.5-001	Polyadenylate-binding protein 1;cDNA FLJ57246, highly similar to Poly(A)-binding protein 1;cDNA FLJ37875 fis, clone BRSSN2018771, highly similar to Poly(A)-binding protein 1;Polyadenylate-binding protein 3;Testis-specific poly(A)-binding protein;PABP3;Poly(A) binding protein, cytoplasmic 3;cDNA, FLJ93858, highly similar to Homo sapiens poly(A) binding protein, cytoplasmic 3 (PABPC3), mRNA;cDNA FL…	70.67	0.00019737	1	1.0172	0.0246034
RAB11B;YPT3;RAB11;RAB11A	cDNA FLJ61136, highly similar to Ras-related protein Rab-11A;GTP-binding protein YPT3;Ras-related protein Rab-11B;RAB11B protein;RAB11B, member RAS oncogene family;Ras-related protein Rab-11A;YL8;cDNA FLJ61134, highly similar to Ras-related protein Rab-11B;cDNA FLJ51542, highly similar to Ras-related protein Rab-11B;cDNA FLJ57160, highly similar to Ras-related protein Rab-11A	28.861	0.0081969	1	1.0243	0.0346383
VDAC;VDAC1	Outer mitochondrial membrane protein porin 1;Plasmalemmal porin;Porin 31HL;Porin 31HM;Voltage-dependent anion-selective channel protein 1;cDNA FLJ38670 fis, clone HSYRA2000190, highly similar to Voltage-dependent anion-selective channel protein 1;cDNA FLJ57715, highly similar to Voltage-dependent anion-selective channel protein 1	30.772	0.0047503	1	1.0249	0.0354832
BAP;PHB2;REA	B-cell receptor-associated protein BAP37;D-prohibitin;Prohibitin-2;Repressor of estrogen receptor activity;PNAS-141;cDNA FLJ56579, highly similar to Prohibitin-2;cDNA FLJ60175, highly similar to Prohibitin-2	33.296	0.00014518	2	1.0589	0.0825664
YWHAZ	14-3-3 protein zeta/delta;Protein kinase C inhibitor protein 1;Tyrosine 3-monooxygenase/tryptophan 5-monooxygenase activation protein zeta polypeptide;14-3-3 protein/cytosolic phospholipase A2 protein	27.745	3.4757e-07	1	1.0621	0.0869196
RPL11;hCG_1739238;RP11-223J15.3-001;RP11-223J15.3-005;RP11-223J15.3-004	60S ribosomal protein L11;CLL-associated antigen KW-12;Cell growth-inhibiting protein 34;cDNA, FLJ92077, Homo sapiens ribosomal protein L11 (RPL11), mRNA;Ribosomal protein L11;Ribosomal protein L11, isoform CRA_b	20.252	7.5938e-16	2	1.075	0.104337
OK/SW-cl.56;TUBB;TUBB5;DAAP-285E11.4-001;DADB-118P11.3-001;DAMA-26D6.3-001;DAMC-316D20.4-001;DAQB-47P19.9-001;DASS-191K16.2-001;hCG_26016;XXbac-BCX111D4.2-001;XXbac-BPG252P9.4-001;DAAP-285E11.4-003;DADB-118P11.3-003;DAMA-26D6.3-003;DAMC-316D20.4-003;DAQB-47P19.9-003;DASS-191K16.2-003;XXbac-BCX111D4.2-003;XXbac-BPG252P9.4-003;TUBB2C;XTP3TPATP1;DAAP-285E11.4-002;DADB-118P11.3-002;DAMA-26D6.3-002;DA…	Tubulin beta chain;Tubulin beta-5 chain;cDNA FLJ56903, highly similar to Tubulin beta-7 chain;Beta 5-tubulin;Beta-tubulin protein;Tubulin beta polypeptide;Tubulin, beta;Tubulin, beta, isoform CRA_a;MRNA encoding beta-tubulin. (from clone D-beta-1);cDNA FLJ50617, highly similar to Tubulin beta-7 chain;cDNA, FLJ79164, highly similar to Tubulin beta-7 chain;cDNA, FLJ79215, highly similar to Tubulin …	52.048	2.5094e-21	14	1.0989	0.13606
NSEP1;YB1;YBX1	CCAAT-binding transcription factor I subunit A;DNA-binding protein B;Enhancer factor I subunit A;Nuclease-sensitive element-binding protein 1;Y-box transcription factor;Y-box-binding protein 1;YBX1 protein;Nuclease sensitive element binding protein-1;RcNSEP1;Putative uncharacterized protein YBX1	41.905	1.743e-08	1	1.1056	0.14483
RPN1	Dolichyl-diphosphooligosaccharide--protein glycosyltransferase 67 kDa subunit;Dolichyl-diphosphooligosaccharide--protein glycosyltransferase subunit 1;Ribophorin I;Ribophorin-1;Ribophorin I variant;RPN1 protein;Similar to ribophorin I;cDNA FLJ51740, highly similar to Dolichyl-diphosphooligosaccharide--proteinglycosyltransferase 67 kDa subunit (EC 2.4.1.119);cDNA FLJ51908, highly similar to Dolich…	72.777	0.0012432	3	1.1063	0.145743
IGF2BP1;IGF2BP3;IMP3;KOC1;VICKZ3;CRDBP;VICKZ1;ZBP1	Putative uncharacterized protein IGF2BP1;IGF-II mRNA-binding protein 3;Insulin-like growth factor 2 mRNA-binding protein 3;KH domain-containing protein overexpressed in cancer;VICKZ family member 3;Coding region determinant-binding protein;IGF-II mRNA-binding protein 1;Insulin-like growth factor 2 mRNA-binding protein 1;VICKZ family member 1;Zip code-binding protein 1	48.597	0.00092199	2	1.1277	0.173383
HSPA1;HSPA1A;HSPA1B;DAAP-21F2.7-001;DAAP-21F2.8-001;DADB-333F21.2-001;DADB-333F21.4-001;hCG_1820593;hCG_43726;HSP70-1;DAAP-21F2.8-002;DADB-333F21.4-002;DAQB-147D11.2-002;XXbac-BCX40G17.4-002;XXbac-BPG254B15.2-002	Heat shock 70 kDa protein 1/2;Heat shock 70 kDa protein 1A/1B;cDNA FLJ75127, highly similar to Homo sapiens heat shock 70kDa protein 1A, mRNA;Heat shock 70kDa protein 1A;Heat shock 70kDa protein 1B;cDNA FLJ54328, highly similar to Heat shock 70 kDa protein 1;cDNA FLJ54283, highly similar to Heat shock 70 kDa protein 1;Heat shock protein 72;cDNA FLJ54370, highly similar to Heat shock 70 kDa protei…	70.051	8.0947e-28	4	1.1343	0.181802
CHCHD3;hCG_2014841;tcag7.1158	Putative uncharacterized protein CHCHD3;Coiled-coil-helix-coiled-coil-helix domain-containing protein 3, mitochondrial;Coiled-coil-helix-coiled-coil-helix domain containing 3;Coiled-coil-helix-coiled-coil-helix domain containing 3, isoform CRA_d;cDNA FLJ53726, highly similar to Coiled-coil-helix-coiled-coil-helixdomain-containing protein 3	27.735	8.2688e-14	2	1.1942	0.256044
OK/SW-cl.48;PHC;SLC25A3	Phosphate carrier protein, mitochondrial;Phosphate transport protein;Solute carrier family 25 member 3;cDNA, FLJ96465, highly similar to Homo sapiens solute carrier family 25 (mitochondrial carrier;phosphate carrier), member 3 (SLC25A3), nuclear gene encodingmitochondrial protein, transcript variant 1b, mRNA;Solute carrier family 25 member 3 isoform b variant;cDNA FLJ90278 fis, clone NT2RP1000325…	40.094	7.7159e-38	1	1.2113	0.276556
ANT2;SLC25A5;ANT1;SLC25A4;ANT3;CDABP0051;SLC25A6;hCG_1746794	Adenine nucleotide translocator 2;ADP,ATP carrier protein 2;ADP,ATP carrier protein, fibroblast isoform;ADP/ATP translocase 2;Solute carrier family 25 member 5;cDNA, FLJ96310, highly similar to Homo sapiens solute carrier family 25 (mitochondrial carrier; adenine nucleotide translocator), member 5 (SLC25A5), mRNA;SLC25A5 protein;Adenine nucleotide translocator 1;ADP,ATP carrier protein 1;ADP,ATP …	32.895	1.6687e-83	6	1.2415	0.312084
HSP70B';HSPA6;HSP70B;HSPA7	Heat shock 70 kDa protein 6;Heat shock 70 kDa protein B';cDNA, FLJ93166, highly similar to Homo sapiens heat shock 70kDa protein 6 (HSP70B') (HSPA6), mRNA;cDNA FLJ36606 fis, clone TRACH2015654, highly similar to HEAT SHOCK 70 kDa PROTEIN 6;cDNA FLJ51847, highly similar to Heat shock 70 kDa protein 6;Heat shock 70kDa protein 6 (HSP70B') variant;Heat shock 70 kDa protein B;Putative heat shock 70 kD…	71.027	1.3333e-96	2	1.2672	0.341644
DDOST;KIAA0115;OK/SW-cl.45;OST48	Dolichyl-diphosphooligosaccharide--protein glycosyltransferase 48 kDa subunit;cDNA FLJ55714, highly similar to Dolichyl-diphosphooligosaccharide--protein glycosyltransferase 48 kDa subunit (EC 2.4.1.119);cDNA FLJ52929, highly similar to Dolichyl-diphosphooligosaccharide--proteinglycosyltransferase 48 kDa subunit (EC2.4.1.119)	50.8	0.0052829	1	1.2921	0.369718
RPL12	60S ribosomal protein L12;Ribosomal protein L12 variant	17.818	2.0326e-12	2	1.3107	0.390338
PYGB	Glycogen phosphorylase, brain form;Phosphorylase	96.695	2.7572e-46	12	1.4006	0.486045
KIAA0152;MLEC	Malectin	32.233	7.07e-278	6	1.4765	0.562181
PHB;hCG_29613	Prohibitin;cDNA FLJ78511, highly similar to Homo sapiens prohibitin (PHB), mRNA;cDNA, FLJ93035, Homo sapiens prohibitin (PHB), mRNA;Prohibitin, isoform CRA_a;Prohibitin variant;PHB protein;Putative uncharacterized protein PHB;cDNA FLJ51562, highly similar to Prohibitin	29.804	3.1943e-33	4	1.4993	0.584289
CAD	Aspartate carbamoyltransferase;CAD protein;Dihydroorotase;Glutamine-dependent carbamoyl-phosphate synthase;Putative uncharacterized protein CAD	242.98	5.298e-17	3	1.5113	0.59579
KIAA1115;PP6R1;SAPS1	SAPS domain family member 1;Serine/threonine-protein phosphatase 6 regulatory subunit 1;SAPS1 protein	103.14	0.012042	1	1.6645	0.735089
OK/SW-cl.26;RPS3	40S ribosomal protein S3;Ribosomal protein S3 variant;Ribosomal protein S3	26.688	0.00047409	2	1.6655	0.735955
RPL7;WUGSC:H_RG054D04.1	60S ribosomal protein L7;Similar to 60S ribosomal protein L7; similar to P18124 (PID:d133021);Putative uncharacterized protein RPL7	32.418	0.0048255	1	1.6856	0.753262
GBE1	1,4-alpha-glucan-branching enzyme;Brancher enzyme;Glycogen-branching enzyme;cDNA FLJ43930 fis, clone TESTI4013441, highly similar to 1,4-alpha-glucan branching enzyme (EC 2.4.1.18);Glucan , branching enzyme 1 variant;cDNA FLJ57129, highly similar to 1,4-alpha-glucan branching enzyme (EC 2.4.1.18);cDNA FLJ59760, highly similar to 1,4-alpha-glucan branching enzyme (EC 2.4.1.18)	80.459	6.1371e-71	8	1.7487	0.806283
LAMBR;LAMR1;RPSA;LAMR1P15	Putative uncharacterized protein ENSP00000346598;37 kDa laminin receptor precursor;37/67 kDa laminin receptor;40S ribosomal protein SA;67 kDa laminin receptor;Colon carcinoma laminin-binding protein;Laminin receptor 1;Laminin-binding protein precursor p40;Multidrug resistance-associated protein MGr1-Ag;NEM/1CHD4;Laminin receptor-like protein LAMRL5;Putative uncharacterized protein RPSA	33.313	2.0173e-13	1	1.8607	0.895845
AGL;GDE	4-alpha-glucanotransferase;Amylo-alpha-1,6-glucosidase;Dextrin 6-alpha-D-glucosidase;Glycogen debrancher;Glycogen debranching enzyme;Oligo-1,4-1,4-glucantransferase	174.89	1.7213e-09	5	2.3444	1.22922
